# Supplementary material
Source: PubMed Central journal article supplement (PMC4567617)
Supplement: IAI.00447-15_zii999091405so1.pdf [file IAI.00447-15_zii999091405so1.pdf]

## Supplemental Materials

### Supplemental Figures

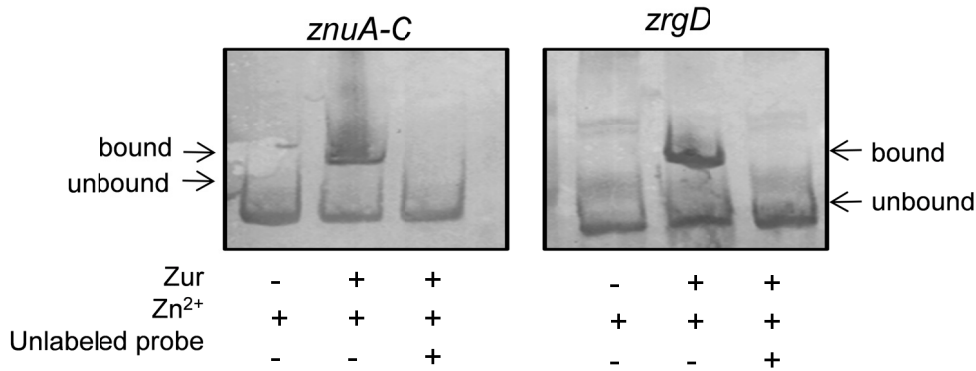

**Fig. S1. Zur binds *znu* and *zrg* promoters specifically.** 0.2 pmol biotin-labeled *znuA-C* and *zrgD* promoter fragments, with and without 40 pmol unlabeled DNA, were incubated with 20 ng recombinant Zur protein in the reaction binding buffer at room temperature for 20 min. 0.4  $\mu\text{M}$  Zn<sup>2+</sup> was included in the reaction mix.

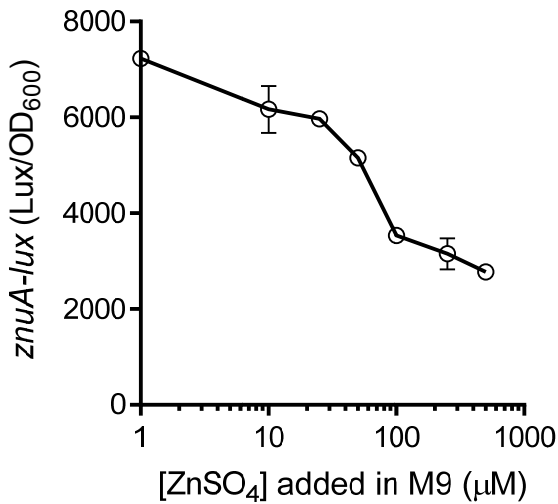

**Fig. S2. *znuA* expression in M9 medium.** Wild type containing P<sub>*znuA*</sub>-*luxCDABE* transcriptional plasmid reporters were grown in M9 minimal medium plus ZnSO<sub>4</sub> indicated to mid-log phase at 37°C. Luminescence was measured and normalized against OD<sub>600</sub>. Data are mean and s.d. of three independent experiments.

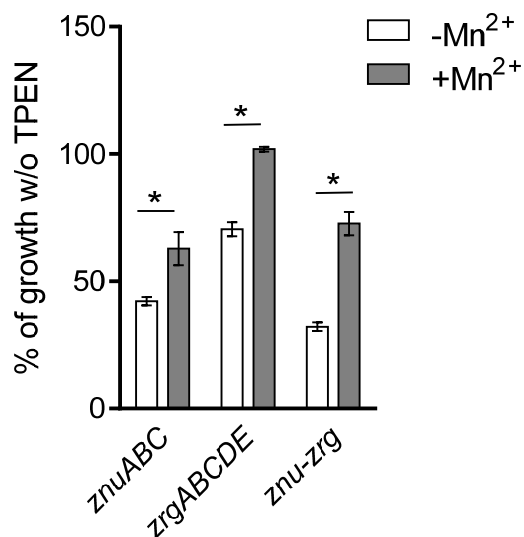

**Fig. S3. Mn<sup>2+</sup> effects on zinc transporter mutants.** The overnight cultures of wild type and zinc transporter mutants were inoculated 1:100 into LB medium, LB medium pretreated with 30  $\mu$ M TPEN, and TPEN-treated LB medium with 10  $\mu$ M of MnSO<sub>4</sub>. The cultures were grown statically at 37°C and at the time points indicated, OD<sub>600</sub> was measured. Data are mean and s.d. of four independent experiments. \*: P<0.05.

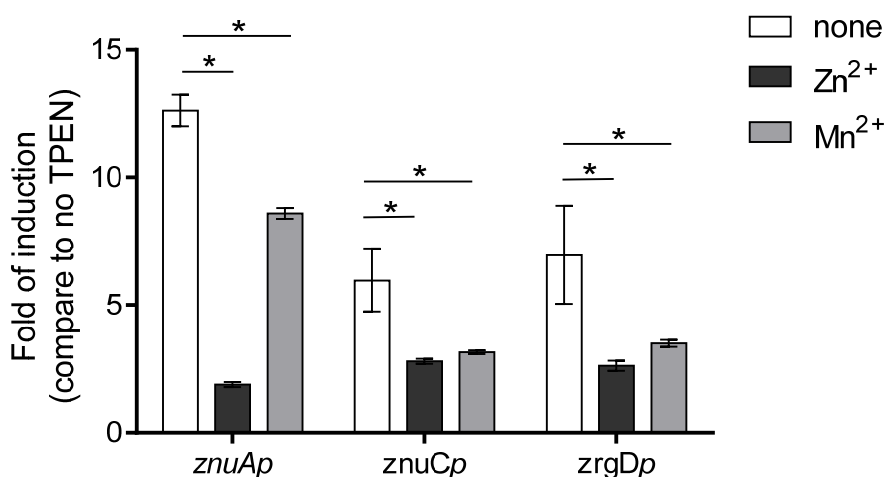

**Fig. S4. Mn<sup>2+</sup> effects on the expression of zinc transporters.** The overnight cultures of wild type containing P<sub>*znuA*</sub><sup>-</sup>, P<sub>*znuC*</sub>, and P<sub>*zrgD*</sub>-*luxCDABE* reporters were inoculated 1:100 into LB medium, LB medium pretreated with 30  $\mu$ M TPEN, and TPEN-treated LB medium with 10  $\mu$ M of ZnSO<sub>4</sub> or MnSO<sub>4</sub>. The cultures were grown statically at 37°C to mid-log phase and luminescence and OD<sub>600</sub> were measured. Fold of induction was calculated by normalizing against Lux/OD<sub>600</sub> expressed in LB (no TPEN treatment). Data are mean and s.d. of four independent experiments. \*: P<0.05.

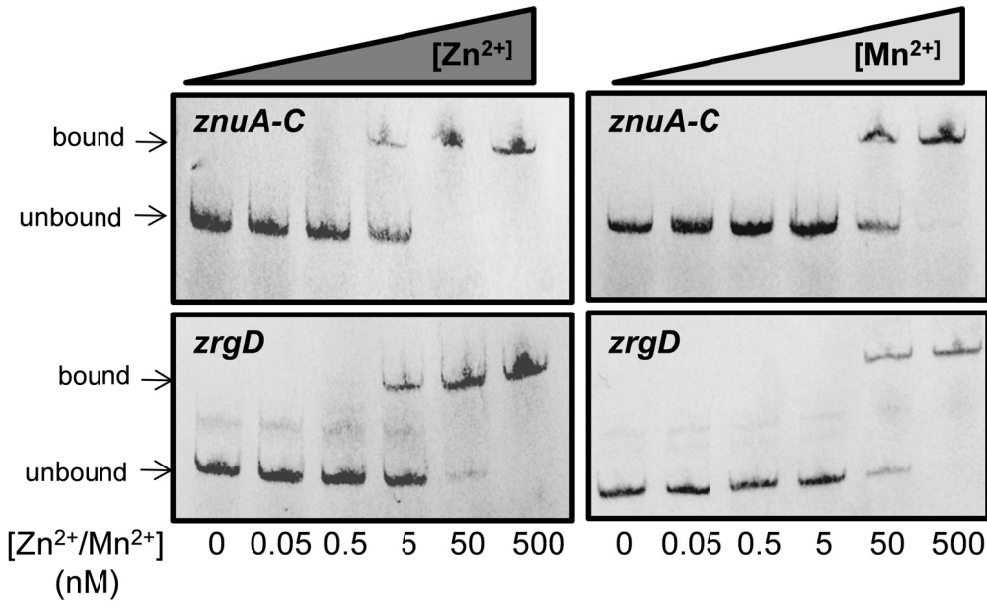

**Fig. S5.  $Mn^{2+}$  effects on Zur activity.** Gel shift assays. 0.2 pmol biotin-labeled *znuA-C* and *zrgD* promoter fragments were incubated with 20 ng recombinant Zur protein in the reaction binding buffer at room temperature for 20 min.  $Zn^{2+}$  and  $Mn^{2+}$  concentrations included in the reaction mix were indicated.

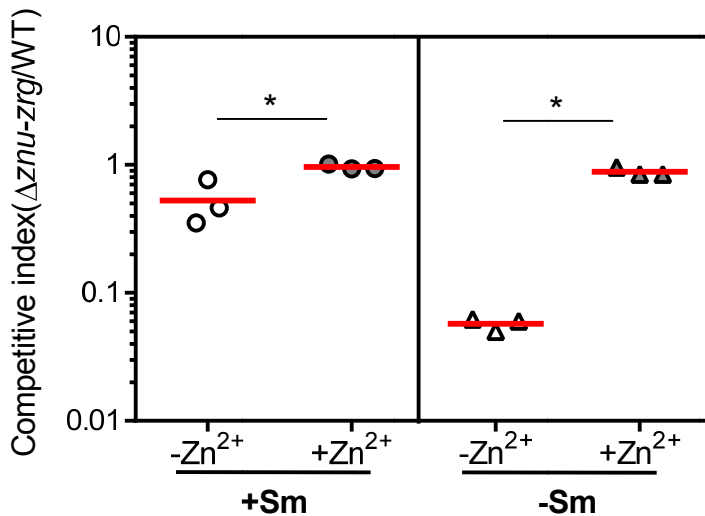

**Fig. S6. The effects of supplemental  $Zn^{2+}$  on *V. cholerae* colonization.** Six-week-old CD-1 mice were fed water containing streptomycin before infected with  $10^8$  cells 1:1 mixed wild type and  $\Delta znu-zrg$  mutants. For one set of mice (+Sm), streptomycin was continuously included in drinking water and for the other set (-Sm), streptomycin was removed 12 hrs post *V. cholerae* infection. When indicated, 10 mg/Kg mouse/day of  $ZnSO_4$  was intragastrically inoculated into

mice. At 5-day post-inoculation, small intestines were collected and the output ratio of the mutant to wild type was determined by plating on LB agar plates containing X-gal. The competitive index was calculated by output ratio of mutants to wild type normalized against input ratio of mutants to wild type. Red horizontal lines: mean of the competitive index. \*:  $P < 0.05$ .
